# Supplementary material for: Work-Related Exposures and Sickness Absence Trajectories: A Nationally Representative Follow-up Study among Finnish Working-Aged People
Source: PubMed Central journal article supplement (PMC6616391; doi:10.3390/ijerph16122099), 2019-06-13
Supplement: ijerph-16-02099-s001.pdf [file ijerph-16-02099-s001.pdf]

**Table S1.** Fit statistics for sickness absence trajectories with a quadratic shape. Selected model in bold.

| No. of Trajectories | AIC <sup>a</sup> | BIC <sup>b</sup><br>N = 3814 | SSABIC <sup>c</sup><br>N = 24596 | Latent Class Proportions (%) | Posterior Probability |
|---------------------|------------------|------------------------------|----------------------------------|------------------------------|-----------------------|
| 2                   | -10517.7         | -10549.1                     | -10558.3                         | 75/25                        | 0.94/0.85             |
| 3                   | <b>-10480.1</b>  | <b>-10517.6</b>              | <b>-10528.8</b>                  | <b>53/35/12</b>              | <b>0.69/0.85/0.84</b> |
| 4                   | -10450.2         | -10506.1                     | -10523.2                         | 20/56/10/14                  | 0.78/0.65/0.64/0.83   |

<sup>a</sup> AIC = Akaike Information Criterion, <sup>b</sup> BIC = Bayesian Information Criterion in subject level, <sup>c</sup> SSABIC = Sample Size Adjusted Bayesian Information criterion.

**Table S2.** Fit statistics for five best three-trajectory models. Selected model in bold.

| Trajectory Shapes <sup>a</sup> | AIC <sup>b</sup> | BIC <sup>c</sup><br>N = 3814 | SSABIC <sup>d</sup><br>N = 24596 | Latent Class Proportions (%) | Posterior Probability |
|--------------------------------|------------------|------------------------------|----------------------------------|------------------------------|-----------------------|
| 001                            | -10505.1         | -10533.2                     | -10541.6                         | 56/34/10                     | 0.79/0.76/0.77        |
| <b>010</b>                     | <b>-10486.0</b>  | <b>-10514.1</b>              | <b>-10522.5</b>                  | <b>54/34/12</b>              | <b>0.71/0.83/0.83</b> |
| 110                            | -10486.9         | -10518.2                     | -10527.5                         | 56/33/11                     | 0.73/0.82/0.83        |
| 111                            | -10485.7         | -10520.0                     | -10530.3                         | 56/33/11                     | 0.72/0.83/0.84        |
| 112                            | -10483.8         | -10521.3                     | -10532.5                         | 55/33/12                     | 0.70/0.84/0.83        |

<sup>a</sup> Trajectory shapes: 0 = intercept, 1 = linear, <sup>b</sup> AIC = Akaike Information Criterion, <sup>c</sup> BIC = Bayesian Information Criterion in subject level, <sup>d</sup> SSABIC = Sample Size Adjusted Bayesian Information Criterion.

**Table S3.** Risk and protective factors in association with three sickness absence trajectories. (Musculoskeletal disorders are adjusted for).

| Summary exposure                                                                                    | All<br>N | Low<br>N | Slowly increasing<br>N | High<br>N | Full model *<br>Trajectory Slowly increasing vs. Low |                     | Full model *<br>Trajectory High vs. Low |                     |
|-----------------------------------------------------------------------------------------------------|----------|----------|------------------------|-----------|------------------------------------------------------|---------------------|-----------------------------------------|---------------------|
|                                                                                                     |          |          |                        |           | OR <sup>α</sup>                                      | 95% CI <sup>β</sup> | OR <sup>α</sup>                         | 95% CI <sup>β</sup> |
| <i>Factors that decrease the risk of sickness absence</i>                                           |          |          |                        |           |                                                      |                     |                                         |                     |
| Prolonged sitting or keyboard use                                                                   |          |          |                        |           |                                                      |                     |                                         |                     |
| Neither                                                                                             | 2207     | 1130     | 784                    | 293       | 1                                                    |                     | 1                                       |                     |
| Either                                                                                              | 763      | 449      | 241                    | 73        | 0.78                                                 | 0.65-0.94           | 0.65                                    | 0.49-0.87           |
| Both                                                                                                | 844      | 504      | 262                    | 78        | 0.70                                                 | 0.58-0.84           | 0.53                                    | 0.40-0.71           |
| <i>Number of factors that increase the risk of sickness absence (nine work factors<sup>ε</sup>)</i> |          |          |                        |           |                                                      |                     |                                         |                     |
| 0                                                                                                   | 1258     | 770      | 391                    | 97        | 1                                                    |                     | 1                                       |                     |
| 1                                                                                                   | 992      | 541      | 346                    | 105       | 1.28                                                 | 1.06-1.54           | 1.42                                    | 1.05-1.92           |
| 2-3                                                                                                 | 769      | 405      | 260                    | 104       | 1.28                                                 | 1.05-1.57           | 1.78                                    | 1.30-2.44           |
| ≥4                                                                                                  | 795      | 367      | 290                    | 138       | 1.68                                                 | 1.37-2.07           | 3.04                                    | 2.24-4.12           |

<sup>α</sup> Odds ratio, <sup>β</sup> 95 % Confidence interval, \*ORs adjusted for age (continuous), gender, basic education, marital status, BMI, smoking, leisure time physical activity, alcohol dependence, job strain, social support at work, sleep problems, physical disorders excluding musculoskeletal causes, and mental disorders. <sup>ε</sup> Prolonged standing, repetitive arm movement, arms above shoulder level, bent postures, squatting or kneeling, using a vibrating tool, high hand grip force, frequent handling of loads at least 5 kg, handling of loads at least 20 kg.

**Table S4.** Risk and protective factors combined in association with three sickness absence trajectories. (Musculoskeletal disorders not adjusted for).

| Combined Exposure | Low<br>N | Slowly Increasing<br>N | High<br>N | Full Model *<br>Trajectory Slowly Increasing vs. Low |                     | Full Model *<br>Trajectory High vs. Low |                     |
|-------------------|----------|------------------------|-----------|------------------------------------------------------|---------------------|-----------------------------------------|---------------------|
|                   |          |                        |           | OR <sup>α</sup>                                      | 95% CI <sup>β</sup> | OR <sup>α</sup>                         | 95% CI <sup>β</sup> |

| <i>Prolonged sitting and keyboard use or physically demanding work factors</i> |     |     |     |      |           |      |           |
|--------------------------------------------------------------------------------|-----|-----|-----|------|-----------|------|-----------|
| Neither                                                                        | 290 | 169 | 48  | 1    |           | 1    |           |
| Prolonged sitting or keyboard use only                                         | 480 | 222 | 49  | 0.78 | 0.61–1.01 | 0.58 | 0.37–0.89 |
| Physically demanding work factors <sup>ε</sup> only                            | 840 | 615 | 245 | 1.30 | 1.04–1.63 | 1.61 | 1.14–2.28 |
| Both                                                                           | 473 | 281 | 102 | 1.02 | 0.80–1.31 | 1.11 | 0.76–1.63 |

1     <sup>α</sup> Odds ratio, <sup>β</sup> 95 % Confidence interval, \* ORs adjusted for age (continuous), gender, basic education,  
 2     marital status, BMI, smoking, leisure time physical activity, alcohol dependence, job strain, social  
 3     support at work, sleep problems, physical disorders excluding musculoskeletal causes, and mental  
 4     disorders. <sup>ε</sup> Prolonged standing, repetitive arm movement, arms above shoulder level, bent postures,  
 5     squatting or kneeling, using a vibrating tool, high hand grip force, frequent handling of loads at least  
 6     5 kg, handling of loads at least 20 kg.

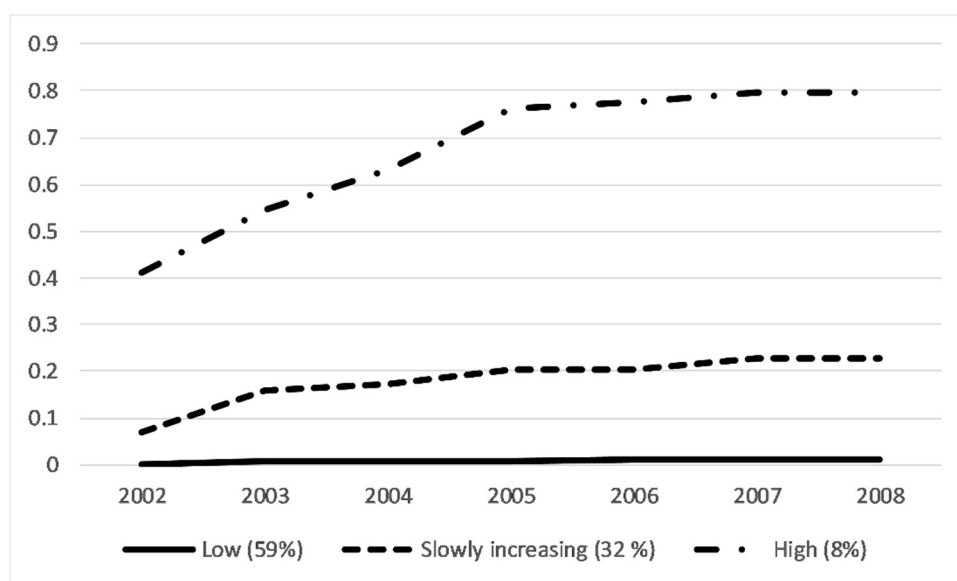

7  
 8     **Figure S1.** Three sickness absence trajectories among 30–44-year old women and men in the follow-  
 9     up from 2002 to 2008; 1 = low 2 = increasing, and 3 = high (x-axis: the follow-up from 2002 through  
 10    2008, y-axis = annual number of sickness absence periods).

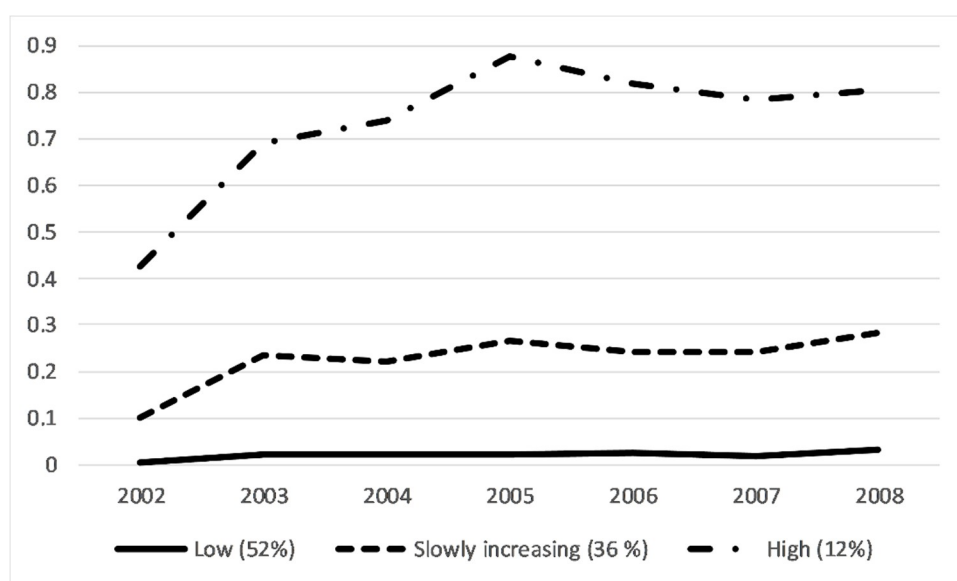

11  
 12    **Figure S2.** Three sickness absence trajectories among 45–59-year old women and men in the follow-  
 13    up from 2002 to 2008; 1 = low 2 = increasing, and 3 = high (x-axis: the follow-up from 2002 through  
 14    2008, y-axis = annual number of sickness absence periods).
